# Supplementary material
Source: PubMed Central journal article supplement (PMC6638028)

Figure S1 Supporting Information

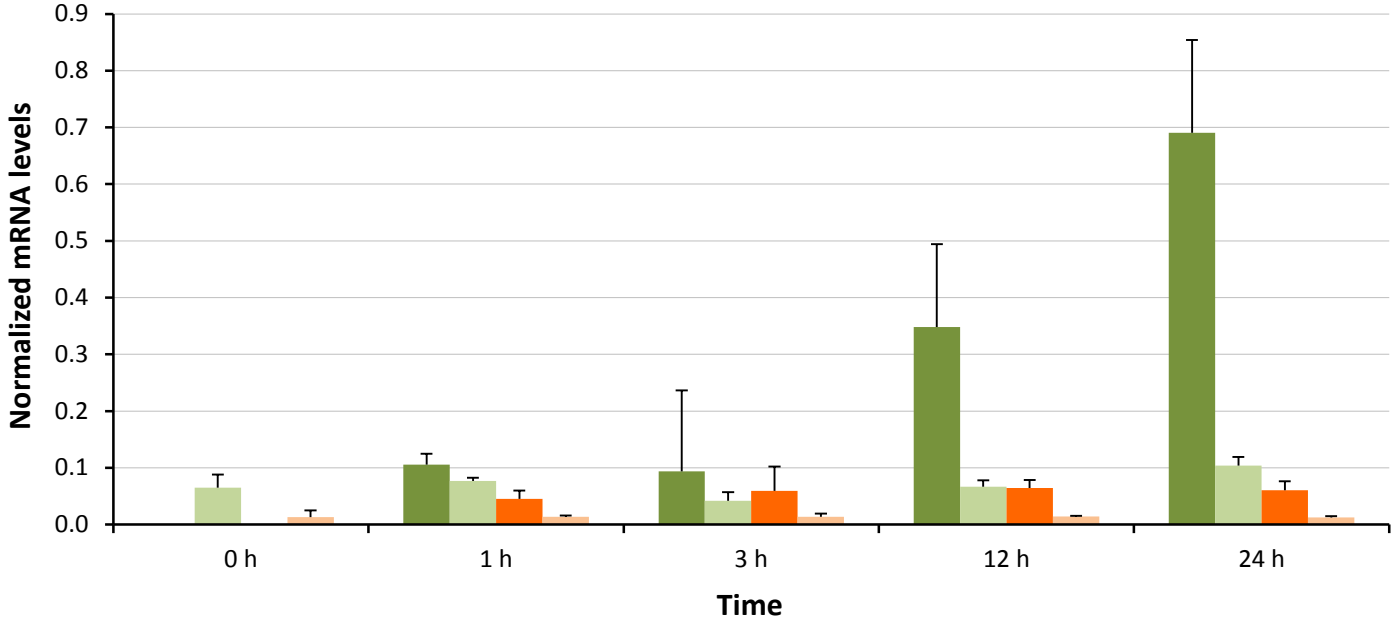

Supplement: MPP-19-418-s001.pdf [file MPP-19-418-s001.pdf]
